# Supplementary material for: Demarcation of Stable Subpopulations within the Pluripotent hESC Compartment
Source: PubMed Central journal article supplement (PMC3578859; doi:10.1371/journal.pone.0057276), 2013-02-21
Supplement: pone.0057276.s007.pdf [file pone.0057276.s007.pdf]

**Supplemental Table 1, 2 & 3. Primers used in this study.**

**Table 1. Recombineering primers**

| Name                 | Sequence 5'-3'                                                             |
|----------------------|----------------------------------------------------------------------------|
| REXVenu<br>s-F       | GGTTGATATATCCTGGTGTAACCTTCAAGAAGGGCACAGGCAGGAAAACATGGTGAGCAAGGGC<br>GAGGAG |
| REXVenu<br>s-pL451-R | CACTGGGGGCTCTTCCACCCAGGCCTTTCTGGTGTCTTGTCTTTGCCGTCGCTCTAGAACTAGTG<br>GAT   |

**Table 2. Q-RT-PCR primers**

| Gene      | Forward primer 5'-3'       | Reverse primer 5'-3'        |
|-----------|----------------------------|-----------------------------|
| REX1      | GCCTTCACTCTAGTAGTGCTCACAGT | GGCAGTAGTGATCTGAGTAAGCTGTCT |
| OCT4      | TGGGCTCGAGAAGGATGTG        | GCATAGTCGCTGCTTGATCG        |
| NANOG     | TGATTTGTGGCCTGAAGAAA       | GAGGCATCTCAGCAGAAGACA       |
| SOX2      | TACAGCATGTCCTACTCGCAG      | GAGGAAGAGGTAACCACAGGG       |
| ECAD      | AGGAATTCTTGCTTTGCTAATTCTG  | CGAAGAAACAGCAAGAGCAGC       |
| NCAD      | CCCACACCCTGGAGACATTG       | GCCGCTTTAAGGCCCTCA          |
| EOMES     | CGGCCTCTGTGGCTCAA          | AAGGAAACATGCGCCTGC          |
| FOXA2     | GGGAGCGGTGAAGATGGA         | TCATGTTGCTCACGGAGGAGTA      |
| CDX2      | CTGGAGCTGGAGAAGGAGTTTC     | ATTTTAACCTGCCTCTCAGAGAGC    |
| SOX17     | GGCGCAGCAGAATCCAGA         | CCACGACTTGCCCAGCAT          |
| BRACHYURY | TGCTTCCCTGAGACCCAGTT       | GATCACTTCTTTCCTTTGCATCAAG   |
| MIXL1     | AAGCCCCAGCTGCCTGTT         | CCCTCCAACCCCGTTTG           |
| AFP       | TGGGACCCGAACCTTCCA         | GGCCACATCCAGGACTAGTTTC      |
| HNF1B     | TCACAGATAACCAGCAGCATCAGT   | GGGCATCCCAGGCTTGTA          |
| GATA6     | GCGGGCTCTACAGCAAGATG       | ACAGTTGGCACAGGACAATCC       |
| GATA4     | TCCAAACCAGAAAACGGAAGC      | GCCCGTAGTGAGATGACAGG        |
| CER       | ACAGTGCCCTTCAGCCAGACT      | ACAACACTTTTTTACAGCCTTCGT    |
| GSC       | GAGGAGAAAGTGGAGGTCTGGTT    | CTCTGATGAGGACCGCTTCTG       |

**Table 3. Bisulphite DNA methylation sequencing primers**

| Gene | Forward primer 5'-3'           | Reverse primer 5'-3'         |
|------|--------------------------------|------------------------------|
| REX1 | GGTTTAAAAGGGTAAATGTGATTATATTTA | CAAAC TACAACCACCCATCAAC      |
| OCT4 | ATTTGTTTTTTGGGTAGTTAAAGGT      | CCAAC TATCTTCATCTTAATAACATCC |
