# Supplementary material for: Demarcation of Stable Subpopulations within the Pluripotent hESC Compartment
Source: PubMed Central journal article supplement (PMC3578859; doi:10.1371/journal.pone.0057276), 2013-02-21
Supplement: pone.0057276.s008.pdf [file pone.0057276.s008.pdf]

**Table 2. Q-RT-PCR primers**

| Gene      | Forward primer 5'-3'       | Reverse primer 5'-3'        |
|-----------|----------------------------|-----------------------------|
| REX1      | GCCTTCACTCTAGTAGTGCTCACAGT | GGCAGTAGTGATCTGAGTAAGCTGTCT |
| OCT4      | TGGGCTCGAGAAGGATGTG        | GCATAGTCGCTGCTTGATCG        |
| NANOG     | TGATTTGTGGCCTGAAGAAA       | GAGGCATCTCAGCAGAAGACA       |
| SOX2      | TACAGCATGTCCTACTCGCAG      | GAGGAAGAGGTAACCACAGGG       |
| ECAD      | AGGAATTCTTGCTTTGCTAATTCTG  | CGAAGAAACAGCAAGAGCAGC       |
| NCAD      | CCCACACCCTGGAGACATTG       | GCCGCTTTAAGGCCCTCA          |
| EOMES     | CGGCCTCTGTGGCTCAAA         | AAGGAAACATGCGCCTGC          |
| FOXA2     | GGGAGCGGTGAAGATGGA         | TCATGTTGCTCACGGAGGAGTA      |
| CDX2      | CTGGAGCTGGAGAAGGAGTTTC     | ATTTTAACCTGCCTCTCAGAGAGC    |
| SOX17     | GGCGCAGCAGAATCCAGA         | CCACGACTTGCCCAGCAT          |
| BRACHYURY | TGCTTCCCTGAGACCCAGTT       | GATCACTTCTTTCTTTGCATCAAG    |
| MIXL1     | AAGCCCCAGCTGCCTGTT         | CCCTCCAACCCCGTTTG           |
| AFP       | TGGGACCCGAACCTTTCCA        | GGCCACATCCAGGACTAGTTTC      |
| HNF1B     | TCACAGATACCAGCAGCATCAGT    | GGGCATCCCAGGCTTGTA          |
| GATA6     | GCGGGCTCTACAGCAAGATG       | ACAGTTGGCACAGGACAATCC       |
| GATA4     | TCCAAACCAGAAAACGGAAGC      | GCCCGTAGTGAGATGACAGG        |
| CER       | ACAGTGCCCTTCAGCCAGACT      | ACAACACTTTTTTCACAGCCTTCGT   |
| GSC       | GAGGAGAAAGTGGAGGTCTGGTT    | CTCTGATGAGGACCGCTTCTG       |
