# Supplementary material for: Demarcation of Stable Subpopulations within the Pluripotent hESC Compartment
Source: PubMed Central journal article supplement (PMC3578859; doi:10.1371/journal.pone.0057276), 2013-02-21
Supplement: pone.0057276.s009.pdf [file pone.0057276.s009.pdf]

**Table 3. Bisulphite DNA methylation sequencing primers**

| Gene | Forward primer 5'-3'           | Reverse primer 5'-3'         |
|------|--------------------------------|------------------------------|
| REX1 | GGTTTAAAAGGGTAAATGTGATTATATTTA | CAAAC TACAACCACCCATCAAC      |
| OCT4 | ATTTGTTTTTTGGGTAGTTAAAGGT      | CCAAC TATCTTCATCTTAATAACATCC |
